# Supplementary material for: Tularemia above the Treeline: Climate and Rodent Abundance Influences Exposure of a Sentinel Species, the Arctic Fox (Vulpes lagopus), to Francisella tularensis
Source: MDPI journal article supplement (doi:10.3390/pathogens12010028), 2022-12-24
Supplement: s1 [file s1]

Supplemental Figure S1. Exposure to *Francisella tularensis* in breeding pairs of arctic foxes and their pups in 2018 and 2019

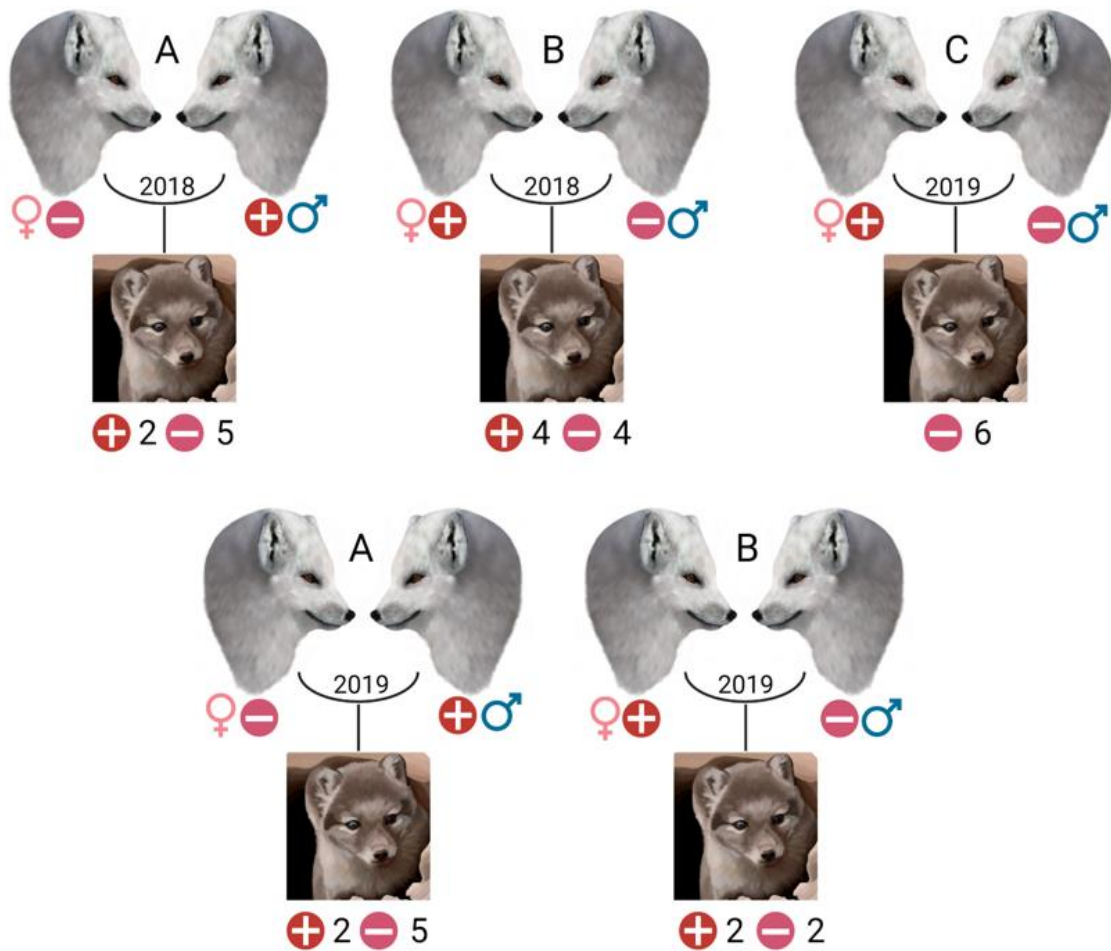

Figure S1. Dens that were tested with unknown status of adults were not included. Both pair A and B were sampled in both 2018 and 2019. Created with BioRender.com
